# Supplementary material for: Influence of oral tobacco versus smoking on multiple sclerosis disease activity and progression
Source: HighWire-hosted journal article supplement (doi:10.1136/jnnp-2022-330848), 2023-03-31
Supplement: jnnp-2022-330848supp001_data_supplement.pdf [file jnnp-2022-330848supp001_data_supplement.pdf]

## Supplementary Methods

The model below was used to predict the variation of MS progression scores by a quadratic specification of the time of follow-up:

$$\text{MS progression scores}_{ij} = \theta_0 + \theta_1 t_{ij} + \theta_2 t_{ij}^2 + \theta_3 \text{smoking} + \theta_4 \text{smoking } t_{ij} + \theta_5 \text{smoking } t_{ij}^2 + \theta_6 \text{covariates} + b_{1i} + b_{2i} t_{ij} + b_{3i} t_{ij}^2 + \epsilon_{ij},$$

$$i = 1, 2, 3 \dots n, j = 1, 2, 3 \dots 15$$

where MS progression scores<sub>ij</sub> represents the estimated mean of annual MS progression scores for individual *i* at time = *j* (in years, ranging from 1 to 15 years); *n* is the sample size;  $\theta_0$  represents the intercept (thus MS progression scores at baseline, when  $t_{ij}=0$ );  $\theta_1$  and  $\theta_2$  are the estimated linear and quadratic MS progression scores change associated with the change from time point *j* to end of follow-up;  $\theta_3$  is the intercept of MS progression scores by smoking status;  $\theta_4$  and  $\theta_5$  are the estimated linear and quadratic terms for the rate of MS progression scores change (slope) by smoking status (never smoking as reference);  $b_{0i}$  represents the random effect for individual *i*,  $b_{1i}$  and  $b_{2i}$  represent the random effect for the slope respectively.

Supplementary table 1. Baseline characteristics of overall sample and by smoking status at diagnosis.

|                                           | Total       | Never smoker | Current smoking | Past smoking | P value |
|-------------------------------------------|-------------|--------------|-----------------|--------------|---------|
| N                                         | 9,089       | 3,675        | 2,897           | 2,517        |         |
| Age at diagnosis (SD)                     | 37.6 (11.1) | 36.5 (11.0)  | 35.9 (10.6)     | 41.1 (10.9)  | <0.0001 |
| Female, n (%)                             | 6541 (72)   | 2669 (73)    | 2073 (72)       | 1851 (71)    | 0.51    |
| Nordic origin, n (%)                      | 7796 (86)   | 3164 (87)    | 2465 (86)       | 2167 (87)    | 0.31    |
| Treatment, n (%)                          | 7488 (82)   | 3116 (85)    | 2303 (80)       | 2069 (82)    | <0.0001 |
| MS phenotype                              |             |              |                 |              |         |
| Relapsing onset, n (%)                    | 8267 (916)  | 3373 (92)    | 2643 (91)       | 2251 (89)    | <0.0001 |
| Progressive onset, n (%)                  | 725 (8.0)   | 254 (6.9)    | 224 (7.7)       | 247 (9.8)    |         |
| Unknown, n (%)                            | 97 (1.1)    | 48 (1.3)     | 30 (1.0)        | 19 (0.8)     |         |
| Disease duration at diagnosis, years (SD) | 6.1 (6.8)   | 5.7 (6.4)    | 5.8 (6.3)       | 7.0 (7.6)    | <0.0001 |
| Baseline EDSS (SD)                        | 2.8 (2.2)   | 2.6 (2.2)    | 3.2 (2.3)       | 2.7 (2.2)    | <0.0001 |
| Baseline MSIS-PHYS (SD)                   | 25 (23)     | 22 (22)      | 30 (25)         | 25 (23)      | <0.0001 |
| Baseline MSIS-PSYCH (SD)                  | 31 (24)     | 28 (23)      | 35 (25)         | 32 (23)      | <0.0001 |
| Baseline SDMT (SD)                        | 50 (13)     | 51 (13)      | 47 (13)         | 49 (13)      | <0.0001 |
| Pack years of smoking (SD)                | 4.6 (8.1)   | 0            | 9.3 (9.8)       | 6.1 (8.2)    | <0.0001 |
| Passive smoking, n (%)                    | 5576 (61)   | 1877 (51)    | 2011 (69)       | 1688 (67)    | <0.0001 |
| Snuff use, n (%)                          | 1568 (17)   | 315 (8.6)    | 635 (22)        | 618 (25)     | <0.0001 |
| Alcohol (gram/week, SD)                   | 31 (45)     | 26 (38)      | 36 (51)         | 35 (45)      | <0.0001 |
| Body mass index, kg/m <sup>2</sup> (SD)   | 25.0 (4.8)  | 24.9 (4.7)   | 25.0 (4.7)      | 25.3 (5.1)   | 0.001   |

Supplementary table 2. Baseline characteristics of overall sample and by passive smoking status at diagnosis.

|                                           | Total       | Never exposed | Current exposure | Past exposure | P value |
|-------------------------------------------|-------------|---------------|------------------|---------------|---------|
| N                                         | 9,089       | 3,513         | 1,177            | 4,399         |         |
| Age at diagnosis (SD)                     | 37.6 (11.1) | 35.4 (11.0)   | 34.9 (11.0)      | 40.1 (10.6)   | <0.0001 |
| Female, n (%)                             | 6541 (72)   | 2476 (70)     | 799 (68)         | 3266 (74)     | <0.0001 |
| Nordic origin, n (%)                      | 7796 (86)   | 3034 (87)     | 1001 (86)        | 3761 (86)     | 0.31    |
| Treatment, n (%)                          | 7488 (82)   | 3017 (86)     | 787 (67)         | 3684 (84)     | <0.0001 |
| MS phenotype                              |             |               |                  |               |         |
| Relapsing onset, n (%)                    | 8267 (916)  | 3242 (92)     | 1062 (90)        | 3963 (90)     | 0.003   |
| Progressive onset, n (%)                  | 725 (8.0)   | 234 (6.7)     | 104 (8.8)        | 387 (8.8)     |         |
| Unknown, n (%)                            | 208 (2.2)   | 37 (1.1)      | 11 (0.9)         | 49 (1.1)      |         |
| Disease duration at diagnosis, years (SD) | 6.1 (6.8)   | 5.6 (6.5)     | 6.1 (6.4)        | 6.4 (7.0)     | <0.0001 |
| Baseline EDSS (SD)                        | 2.8 (2.2)   | 2.5 (2.2)     | 4.0 (2.5)        | 2.7 (2.1)     | <0.0001 |
| Baseline MSIS-PHYS (SD)                   | 225 (23)    | 22 (22)       | 33 (25)          | 27 (23)       | <0.0001 |
| Baseline SDMT (SD)                        | 50 (13)     | 51 (13)       | 44 (14)          | 49 (13)       | <0.0001 |
| Ever smoking, n (%)                       | 5414 (60)   | 1715 (49)     | 902 (77)         | 2797 (64)     | <0.0001 |
| Pack years of smoking (SD)                | 4.6 (8.1)   | 2.7 (6.1)     | 6.8 (9.3)        | 5.5 (8.7)     | <0.0001 |
| Snuff use, n (%)                          | 1568 (17)   | 589 (17)      | 216 (18)         | 763 (17)      | 0.44    |
| Alcohol (gram/week, SD)                   | 31 (45)     | 31 (44)       | 29 (47)          | 33 (45)       | <0.0001 |
| Body mass index, kg/m <sup>2</sup> (SD)   | 25.0 (4.8)  | 24.5 (4.4)    | 25.0 (4.9)       | 25.4 (5.0)    | <0.0001 |

Supplementary table 3. Baseline characteristics of overall sample and by snuff use status at diagnosis.

|                                           | Total       | Never exposed | Current exposure | Past exposure | P value |
|-------------------------------------------|-------------|---------------|------------------|---------------|---------|
| N                                         | 9,089       | 7,540         | 1,097            | 452           |         |
| Age at diagnosis (SD)                     | 37.6 (11.1) | 37.9 (11.3)   | 35.0 (9.9)       | 38.9 (9.8)    | <0.0001 |
| Female, n (%)                             | 6541 (72)   | 5966 (79)     | 402 (37)         | 162 (36)      | <0.0001 |
| Nordic origin, n (%)                      | 7796 (86)   | 6420 (86)     | 963 (89)         | 395 (95)      | <0.0001 |
| Treatment, n (%)                          | 7488 (82)   | 6102 (81)     | 971 (89)         | 399 (88)      | <0.0001 |
| MS phenotype                              |             |               |                  |               |         |
| Relapsing onset, n (%)                    | 8267 (91)   | 6839 (91)     | 1004 (92)        | 409 (90)      | 0.29    |
| Progressive onset, n (%)                  | 725 (8.0)   | 592 (7.9)     | 88 (8.0)         | 41 (9.1)      |         |
| Unknown, n (%)                            | 208 (2.2)   | 90 (1.2)      | 5 (0.5)          | 2 (0.4)       |         |
| Disease duration at diagnosis, years (SD) | 6.1 (6.8)   | 6.2 (6.9)     | 5.4 (5.5)        | 5.6 (6.6)     | <0.0001 |
| Baseline EDSS (SD)                        | 2.8 (2.2)   | 2.9 (2.3)     | 2.7 (2.2)        | 2.6 (2.1)     | 0.05    |
| Baseline MSIS-PHYS (SD)                   | 225 (23)    | 25 (23)       | 26 (23)          | 23 (22)       | 0.06    |
| Baseline SDMT (SD)                        | 50 (13)     | 50 (13)       | 48 (13)          | 51 (12)       | <0.0001 |
| Snuff use duration, years (SD)            | 2.0 (6.3)   | 0             | 9.4 (9.7)        | 17.8 (10.4)   | <0.0001 |
| Ever smoking, n (%)                       | 5414 (60)   | 4161 (55)     | 882 (80)         | 359 (79)      | <0.0001 |
| Pack years of smoking (SD)                | 4.6 (8.1)   | 4.3 (7.7)     | 6.4 (8.1)        | 6.2 (9.9)     | <0.0001 |
| Passive smoking, n (%)                    | 5567 (61)   | 4597 (61)     | 678 (62)         | 292 (65)      | 0.32    |
| Alcohol (gram/week, SD)                   | 35 (73)     | 32 (72)       | 51 (72)          | 54 (79)       | <0.0001 |
| Body mass index, kg/m <sup>2</sup> (SD)   | 25.0 (4.8)  | 25.0 (4.9)    | 25.2 (4.5)       | 25.4 (4.5)    | 0.0009  |

Supplementary table 4.  $\beta$  coefficients and 95% CIs of the associations between active/passive smoking and MS progression over 15 years using mixed-effect models.

|                                      | <b>EDSS</b>                       | <b>MSIS-PHYS</b>                  | <b>SDMT</b>                       |
|--------------------------------------|-----------------------------------|-----------------------------------|-----------------------------------|
|                                      | <b><math>\beta</math> (95%CI)</b> | <b><math>\beta</math> (95%CI)</b> | <b><math>\beta</math> (95%CI)</b> |
| <b>Smoking status</b>                |                                   |                                   |                                   |
| Never smoker                         | Ref                               | Ref                               | Ref                               |
| Past smoker                          | -0.06 (-0.17, 0.05)               | 1.21 (-0.02, 2.44)                | -0.46 (-1.35, 0.43)               |
| Current smoker                       | 0.48 (0.38, 0.58)                 | 6.61 (5.43, 7.80)                 | -3.64 (-4.50, -2.78)              |
| Never smoker x time                  | Ref                               | Ref                               | Ref                               |
| Past smoker x time                   | 0.02 (0.01, 0.03)                 | 0.01 (-0.25, 0.27)                | -0.27 (-0.43, -0.10)              |
| Current smoker x time                | 0.03 (0.02, 0.04)                 | 0.03 (-0.22, 0.28)                | -0.004 (-0.16, 0.15)              |
| Never smoker x time <sup>2</sup>     | Ref                               | Ref                               | Ref                               |
| Past smoker x time <sup>2</sup>      | -0.001 (-0.002, 0.000)            | -0.006(-0.039, 0.026)             | 0.005 (-0.020, 0.029)             |
| Current smoker x time <sup>2</sup>   | -0.001 (-0.002, 0.000)            | -0.019(-0.049, 0.012)             | -0.002 (-0.025, 0.022)            |
| <b>Passive smoking</b>               |                                   |                                   |                                   |
| Never exposed                        | Ref                               | Ref                               | Ref                               |
| Past exposure                        | 0.05 (-0.04, 0.15)                | 2.00 (0.93, 3.06)                 | -0.37 (-1.13, 0.40)               |
| Current exposure                     | 1.23 (1.09, 1.37)                 | 7.67 (5.70, 9.64)                 | -5.83 (-7.27, -4.40)              |
| Never exposed x time                 | Ref                               | Ref                               | Ref                               |
| Past exposure x time                 | 0.01 (0.001, 0.02)                | 0.12 (-0.10, 0.02)                | -0.49 (-0.63, -0.36)              |
| Current exposure x time              | 0.04 (0.03, 0.06)                 | 0.23 (-0.19, 0.64)                | -0.07 (-0.33, 0.19)               |
| Never exposed x time <sup>2</sup>    | Ref                               | Ref                               | Ref                               |
| Past exposure x time <sup>2</sup>    | -0.000 (-0.001, 0.001)            | -0.012 (-0.039, 0.015)            | 0.045 (0.025, 0.066)              |
| Current exposure x time <sup>2</sup> | -0.001(-0.003, 0.000)             | -0.018 (-0.068, 0.032)            | 0.022 (-0.016, 0.060)             |

All analyses were adjusted for age at diagnosis, sex, disease phenotype, disease duration, baseline EDSS, and disease-modifying therapy (ever/never).

Supplementary table 5. Predicted mean outcome values at baseline, 3, 5, 10, and 15 years post-baseline, by smoking status and exposure to passive smoking status, respectively.

| Predicted mean EDSS scores at baseline, 3, 5, 10 and 15 years of follow-up             |                  |                  |                  |                  |                  |
|----------------------------------------------------------------------------------------|------------------|------------------|------------------|------------------|------------------|
| Smoking status                                                                         | Baseline         | Year 3           | Year 5           | Year 10          | Year 15          |
| Never smoker                                                                           | 2.43 (2.37-2.50) | 2.72 (2.65-2.78) | 2.89 (2.82-2.96) | 3.26 (3.18-3.35) | 3.56 (3.42-3.69) |
| Past smoker                                                                            | 2.55 (2.47-2.63) | 2.90 (2.82-2.98) | 3.11 (3.02-3.19) | 3.55 (3.45-3.65) | 3.87 (3.71-4.03) |
| Current smoker                                                                         | 2.96 (2.88-3.03) | 3.31 (3.23-3.39) | 3.52 (3.44-3.60) | 3.95 (3.86-4.05) | 4.25 (4.11-4.40) |
| Predicted mean MSIS-28 physical score at baseline, 3, 5, 10, and 15 years of follow-up |                  |                  |                  |                  |                  |
| Smoking status                                                                         | Baseline         | Year 3           | Year 5           | Year 10          | Year 15          |
| Never smoker                                                                           | 20.0 (19.2-20.7) | 19.7 (19.0-20.5) | 20.1 (19.4-20.9) | 23.0 (21.8-24.2) | 28.6 (25.8-31.4) |
| Past smoker                                                                            | 22.7 (21.8-23.7) | 22.6 (21.6-23.5) | 22.9 (21.9-23.9) | 25.2 (23.6-26.9) | 29.8 (26.0-33.7) |
| Current smoker                                                                         | 28.0 (27.1-28.9) | 27.8 (27.0-28.9) | 27.9 (27.0-28.9) | 29.5 (28.0-31.0) | 32.8 (29.3-36.2) |
| Predicted mean SDMT score at baseline, 3, 5, 10 and 15 years of follow-up              |                  |                  |                  |                  |                  |
| Smoking status                                                                         | Baseline         | Year 3           | Year 5           | Year 10          | Year 15          |
| Never smoker                                                                           | 51.8 (51.3-52.4) | 56.9 (56.4-57.4) | 57.4 (56.8-57.9) | 48.1 (47.0-49.1) | 24.0 (21.6-26.4) |
| Past smoker                                                                            | 49.9 (49.2-50.6) | 54.2 (53.5-54.9) | 54.2 (53.5-54.9) | 43.9 (42.5-45.3) | 19.1 (15.9-22.4) |
| Current smoker                                                                         | 47.6 (47.0-48.3) | 52.7 (52.0-53.4) | 53.1 (52.4-53.8) | 43.7 (42.4-45.0) | 19.4 (16.5-22.4) |
| Predicted mean EDSS scores at baseline, 3, 5, 10 and 15 years of follow-up             |                  |                  |                  |                  |                  |
| Passive smoking                                                                        | Baseline         | Year 3           | Year 5           | Year 10          | Year 15          |
| Never exposed                                                                          | 2.36 (2.30-2.43) | 2.66 (2.59-2.73) | 2.84 (2.77-2.91) | 3.22 (3.14-3.31) | 3.51 (3.38-3.64) |
| Past exposure                                                                          | 2.56 (2.50-2.62) | 2.88 (2.82-2.94) | 3.08 (3.01-3.14) | 3.49 (3.41-3.56) | 3.78 (3.66-3.90) |
| Current exposure                                                                       | 3.83 (3.71-3.95) | 4.24 (4.12-4.36) | 4.49 (4.36-4.61) | 4.99 (4.85-5.14) | 5.35 (5.12-5.58) |
| Predicted mean MSIS-28 physical score at baseline, 3, 5, 10, and 15 years of follow-up |                  |                  |                  |                  |                  |
| Passive smoking                                                                        | Baseline         | Year 3           | Year 5           | Year 10          | Year 15          |
| Never exposed                                                                          | 20.1 (19.3-20.8) | 19.7 (19.0-20.5) | 20.0 (19.2-20.8) | 22.5 (21.3-23.7) | 27.6 (24.8-30.3) |
| Past exposure                                                                          | 24.6 (23.9-25.3) | 24.4 (23.7-25.1) | 24.8 (24.0-25.5) | 27.0 (25.8-28.2) | 31.3 (28.4-34.1) |
| Current exposure                                                                       | 30.8 (29.0-32.6) | 30.8 (29.0-32.6) | 31.2 (29.3-33.1) | 33.6 (30.5-36.6) | 37.9 (31.1-44.7) |
| Predicted mean SDMT score at baseline, 3, 5, 10 and 15 years of follow-up              |                  |                  |                  |                  |                  |
| Passive smoking                                                                        | Baseline         | Year 3           | Year 5           | Year 10          | Year 15          |
| Never exposed                                                                          | 51.5 (51.0-52.1) | 56.9 (56.4-57.5) | 57.3 (56.8-57.9) | 47.2 (46.2-48.3) | 21.3 (18.9-23.6) |
| Past exposure                                                                          | 49.7 (49.1-50.2) | 54.0 (53.5-54.5) | 54.1 (53.6-54.7) | 44.9 (43.9-46.0) | 22.1 (19.7-24.5) |
| Current exposure                                                                       | 44.6 (43.3-46.0) | 50.0 (48.7-51.3) | 50.6 (49.2-52.0) | 41.8 (39.2-44.4) | 18.1 (12.3-24.0) |

All analyses were adjusted for age at diagnosis, sex, disease phenotype, disease duration, baseline EDSS, and disease-modifying therapy.

Supplementary 6. HR with 95% CI of having unfavorable outcomes post-diagnosis, by smoking habits at diagnosis.

| First clinical disease worsening (CDW)                                         |                           |                          |                           |                          |                           |
|--------------------------------------------------------------------------------|---------------------------|--------------------------|---------------------------|--------------------------|---------------------------|
|                                                                                | Total                     | Women                    |                           | Men                      |                           |
| Smoking status                                                                 | aHR (95% CI) <sup>1</sup> | HR (95% CI) <sup>2</sup> | aHR (95% CI) <sup>1</sup> | HR (95% CI) <sup>2</sup> | aHR (95% CI) <sup>1</sup> |
| Never exposed                                                                  | 1.0 (reference)           | 1.0 (reference)          | 1.0 (reference)           | 1.0 (reference)          | 1.0 (reference)           |
| Past smoking                                                                   | 1.01 (0.94-1.08)          | 1.02 (0.94-1.10)         | 1.01 (0.90-1.05)          | 1.12 (0.99-1.26)         | 1.08 (0.94-1.23)          |
| Current smoking                                                                | 1.13 (1.06-1.21)          | 1.13 (1.05-1.22)         | 1.13 (1.05-1.22)          | 1.15 (1.01-1.31)         | 1.13 (1.00-1.27)          |
| EDSS 3                                                                         |                           |                          |                           |                          |                           |
| Smoking status                                                                 | aHR (95% CI) <sup>1</sup> | HR (95% CI) <sup>2</sup> | aHR (95% CI) <sup>1</sup> | HR (95% CI) <sup>2</sup> | aHR (95% CI) <sup>1</sup> |
| Never smoking                                                                  | 1.0 (reference)           | 1.0 (reference)          | 1.0 (reference)           | 1.0 (reference)          | 1.0 (reference)           |
| Past smoking                                                                   | 1.00 (0.90-1.12)          | 1.08 (0.96-1.22)         | 0.99 (0.86-1.10)          | 1.20 (0.98-1.47)         | 1.07 (0.86-1.33)          |
| Current smoking                                                                | 1.21 (1.09-1.34)          | 1.22 (1.09-1.37)         | 1.19 (1.05-1.34)          | 1.26 (1.02-1.54)         | 1.28 (1.03-1.59)          |
| EDSS 4                                                                         |                           |                          |                           |                          |                           |
| Smoking status                                                                 | aHR (95% CI) <sup>1</sup> | HR (95% CI) <sup>2</sup> | aHR (95% CI) <sup>1</sup> | HR (95% CI) <sup>2</sup> | aHR (95% CI) <sup>1</sup> |
| Never smoking                                                                  | 1.0 (reference)           | 1.0 (reference)          | 1.0 (reference)           | 1.0 (reference)          | 1.0 (reference)           |
| Past smoking                                                                   | 1.06 (0.92-1.23)          | 1.02 (0.86-1.21)         | 0.94 (0.78-1.08)          | 1.18 (0.91-1.55)         | 1.08 (0.83-1.44)          |
| Current smoking                                                                | 1.28 (1.11-1.45)          | 1.25 (1.07-1.46)         | 1.28 (1.09-1.50)          | 1.34 (1.03-1.74)         | 1.42 (1.08-1.86)          |
| Physical worsening (increased MSIS-29 physical score by 7.5 or more)           |                           |                          |                           |                          |                           |
| Smoking status                                                                 | aHR (95% CI) <sup>1</sup> | HR (95% CI) <sup>2</sup> | aHR (95% CI) <sup>1</sup> | HR (95% CI) <sup>2</sup> | aHR (95% CI) <sup>1</sup> |
| Never smoking                                                                  | 1.0 (reference)           | 1.0 (reference)          | 1.0 (reference)           | 1.0 (reference)          | 1.0 (reference)           |
| Past smoking                                                                   | 1.06 (0.95-1.19)          | 1.07 (0.95-1.22)         | 1.03 (0.91-1.18)          | 1.17 (0.98-1.46)         | 1.13 (0.91-1.40)          |
| Current smoking                                                                | 1.23 (1.11-1.37)          | 1.18 (1.05-1.33)         | 1.22 (1.08-1.38)          | 1.19 (0.96-1.44)         | 1.25 (1.01-1.54)          |
| Psychological worsening (increased MSIS-29 psychological score by 7.5 or more) |                           |                          |                           |                          |                           |
| Smoking status                                                                 | aHR (95% CI) <sup>1</sup> | HR (95% CI) <sup>2</sup> | aHR (95% CI) <sup>1</sup> | HR (95% CI) <sup>2</sup> | aHR (95% CI) <sup>1</sup> |
| Never smoking                                                                  | 1.0 (reference)           | 1.0 (reference)          | 1.0 (reference)           | 1.0 (reference)          | 1.0 (reference)           |
| Past smoking                                                                   | 1.18 (1.07-1.31)          | 1.05 (0.94-1.18)         | 1.11 (0.98-1.24)          | 1.39 (1.12-1.63)         | 1.44 (1.18-1.76)          |
| Current smoking                                                                | 1.27 (1.15-1.40)          | 1.13 (1.01-1.26)         | 1.21 (1.08-1.36)          | 1.35 (1.15-1.68)         | 1.44 (1.19-1.76)          |
| Cognitive disability worsening (decreased SDMT score by 8 or more)             |                           |                          |                           |                          |                           |
| Smoking status                                                                 | aHR (95% CI) <sup>1</sup> | HR (95% CI) <sup>2</sup> | aHR (95% CI) <sup>1</sup> | HR (95% CI) <sup>2</sup> | aHR (95% CI) <sup>1</sup> |
| Never smoking                                                                  | 1.0 (reference)           | 1.0 (reference)          | 1.0 (reference)           | 1.0 (reference)          | 1.0 (reference)           |
| Past smoking                                                                   | 1.08 (0.93-1.25)          | 0.99 (0.84-1.16)         | 1.14 (0.96-1.35)          | 0.96 (0.72-1.23)         | 0.92 (0.68-1.23)          |
| Current smoking                                                                | 1.17 (1.02-1.36)          | 1.22 (1.04-1.43)         | 1.16 (0.98-1.38)          | 1.05 (0.81-1.38)         | 1.21 (0.91-1.60)          |

<sup>1</sup>adjusted for age at diagnosis, disease phenotype, disease duration, baseline EDSS, disease-modifying therapy, passive smoking, and snuff use; <sup>2</sup>crude.

Supplementary table 7. HR with 95% CI of having unfavorable outcomes post-diagnosis, by passive smoking status at diagnosis. Restricted to **never-smokers** at diagnosis.

| First clinical disease worsening (CDW)                                 |      |            |             |                          |                          |
|------------------------------------------------------------------------|------|------------|-------------|--------------------------|--------------------------|
| Passive smoking                                                        | N    | Years (SD) | Outcome (%) | HR (95% CI) <sup>1</sup> | HR (95% CI) <sup>2</sup> |
| Never exposed                                                          | 1798 | 6.6 (4.9)  | 991 (55)    | 1.0 (reference)          | 1.0 (reference)          |
| Past exposure                                                          | 1602 | 6.3 (4.9)  | 874 (55)    | 1.03 (0.93-1.12)         | 0.99 (0.90-1.08)         |
| Current exposure                                                       | 275  | 6.4 (5.1)  | 166 (60)    | 1.19 (1.01-1.40)         | 1.17 (1.00-1.38)         |
| EDSS 3                                                                 |      |            |             |                          |                          |
| Passive smoking                                                        | N    | Years (SD) | Outcome (%) | HR (95% CI)              | HR (95% CI)              |
| Never exposed                                                          | 1173 | 8.2 (5.3)  | 451 (38)    | 1.0 (reference)          | 1.0 (reference)          |
| Past exposure                                                          | 1003 | 7.5 (5.2)  | 363 (36)    | 1.00 (0.87-1.14)         | 1.00 (0.81-1.07)         |
| Current exposure                                                       | 105  | 7.1 (5.0)  | 53 (50)     | 1.48 (1.12-1.97)         | 1.38 (1.04-1.84)         |
| EDSS 4                                                                 |      |            |             |                          |                          |
| Passive smoking                                                        | N    | Years (SD) | Outcome (%) | HR (95% CI)              | HR (95% CI)              |
| Never exposed                                                          | 1173 | 9.7 (5.3)  | 248 (21)    | 1.0 (reference)          | 1.0 (reference)          |
| Past exposure                                                          | 1003 | 9.4 (5.4)  | 184 (18)    | 0.95 (0.78-1.14)         | 0.94 (0.73-1.06)         |
| Current exposure                                                       | 105  | 9.5 (4.9)  | 34 (32)     | 1.65 (1.15-2.36)         | 1.52 (1.06-2.18)         |
| Physical worsening (increased MSIS-29 score by 7.5 or more)            |      |            |             |                          |                          |
| Passive smoking                                                        | N    | Years (SD) | Outcome (%) | HR (95% CI)              | HR (95% CI)              |
| Never exposed                                                          | 1113 | 5.3 (4.4)  | 469 (42)    | 1.0 (reference)          | 1.0 (reference)          |
| Past exposure                                                          | 912  | 4.8 (4.5)  | 376 (41)    | 1.06 (0.93-1.22)         | 1.02 (0.89-1.17)         |
| Current exposure                                                       | 89   | 4.4 (4.5)  | 46 (52)     | 1.54 (1.13-2.08)         | 1.63 (1.20-2.21)         |
| Psychological worsening (increased MSIS-29 psych score by 7.5 or more) |      |            |             |                          |                          |
| Passive smoking                                                        | N    | Years (SD) | Outcome (%) | HR (95% CI)              | HR (95% CI)              |
| Never exposed                                                          | 1108 | 4.9 (4.4)  | 550 (50)    | 1.0 (reference)          | 1.0 (reference)          |
| Past exposure                                                          | 912  | 7.8 (4.4)  | 440 (48)    | 1.05 (0.92-1.19)         | 1.12 (0.99-1.28)         |
| Current exposure                                                       | 89   | 4.3 (4.3)  | 44 (49)     | 1.19 (0.87-1.61)         | 1.31 (0.96-1.78)         |
| Cognitive disability worsening (decreased SDMT score by 8 or more)     |      |            |             |                          |                          |
| Passive smoking                                                        | N    | Years (SD) | Outcome (%) | HR (95% CI)              | HR (95% CI)              |
| Never exposed                                                          | 1177 | 5.6 (3.5)  | 264 (22)    | 1.0 (reference)          | 1.0 (reference)          |
| Past exposure                                                          | 944  | 5.2 (3.5)  | 212 (22)    | 1.09 (0.91-1.31)         | 0.99 (0.82-1.19)         |
| Current exposure                                                       | 96   | 5.9 (3.8)  | 28 (29)     | 1.39 (0.94-2.05)         | 1.69 (1.13-2.47)         |

crude; adjusted for age at diagnosis, sex, disease phenotype, disease duration, baseline EDSS, disease-modifying therapy, and snuff use.



Supplementary table 8. HR with 95% CI of having unfavorable outcomes post-diagnosis, by passive smoking status at diagnosis. Restricted to those with **disease modifying treatment**.

| First clinical disease worsening (CDW)                                         |      |            |             |                          |                          |
|--------------------------------------------------------------------------------|------|------------|-------------|--------------------------|--------------------------|
| Passive smoking                                                                | N    | Years (SD) | Outcome (%) | HR (95% CI) <sup>1</sup> | HR (95% CI) <sup>2</sup> |
| Never exposed                                                                  | 3017 | 6.7 (5.0)  | 1718 (57)   | 1.0 (reference)          | 1.0 (reference)          |
| Past exposure                                                                  | 3684 | 6.3 (4.9)  | 2149 (58)   | 1.10 (1.03-1.17)         | 1.03 (0.97-1.10)         |
| Current exposure                                                               | 787  | 6.4 (5.1)  | 528 (67)    | 1.29 (1.17-1.43)         | 1.25 (1.13-1.39)         |
| EDSS 3                                                                         |      |            |             |                          |                          |
| Passive smoking                                                                | N    | Years (SD) | Outcome (%) | HR (95% CI)              | HR (95% CI)              |
| Never exposed                                                                  | 2073 | 8.3 (5.3)  | 792 (38)    | 1.0 (reference)          | 1.0 (reference)          |
| Past exposure                                                                  | 2350 | 7.6 (5.3)  | 977 (42)    | 1.18 (1.07-1.30)         | 1.04 (0.94-1.14)         |
| Current exposure                                                               | 342  | 7.2 (5.4)  | 195 (57)    | 1.70 (1.45-2.0)          | 1.56 (1.33-1.82)         |
| EDSS 4                                                                         |      |            |             |                          |                          |
| Passive smoking                                                                | N    | Years (SD) | Outcome (%) | HR (95% CI)              | HR (95% CI)              |
| Never exposed                                                                  | 2073 | 9.8 (5.4)  | 435 (21)    | 1.0 (reference)          | 1.0 (reference)          |
| Past exposure                                                                  | 2350 | 9.6 (5.5)  | 498 (21)    | 1.07 (0.94-1.22)         | 0.97 (0.88-1.05)         |
| Current exposure                                                               | 342  | 9.3 (5.6)  | 133 (39)    | 2.01 (1.66-2.44)         | 1.63 (1.41-2.11)         |
| Physical worsening (increased MSIS-29 physical score by 7.5 or more)           |      |            |             |                          |                          |
| Passive smoking                                                                | N    | Years (SD) | Outcome (%) | HR (95% CI)              | HR (95% CI)              |
| Never exposed                                                                  | 2029 | 5.4 (4.5)  | 875 (43)    | 1.0 (reference)          | 1.0 (reference)          |
| Past exposure                                                                  | 2306 | 4.9 (4.7)  | 1012 (44)   | 1.12 (1.02-1.23)         | 1.05 (0.96-1.16)         |
| Current exposure                                                               | 340  | 4.5 (4.3)  | 172 (51)    | 1.42 (1.20-1.67)         | 1.45 (1.23-1.72)         |
| Psychological worsening (increased MSIS-29 psychological score by 7.5 or more) |      |            |             |                          |                          |
| Passive smoking                                                                | N    | Years (SD) | Outcome (%) | HR (95% CI)              | HR (95% CI)              |
| Never exposed                                                                  | 2025 | 5.0 (4.5)  | 1041 (51)   | 1.0 (reference)          | 1.0 (reference)          |
| Past exposure                                                                  | 2296 | 4.5 (4.7)  | 1164 (51)   | 1.08 (0.99-1.17)         | 1.13 (1.04-1.24)         |
| Current exposure                                                               | 336  | 4.2 (4.3)  | 189 (56)    | 1.29 (1.11-1.51)         | 1.41 (1.21-1.65)         |
| Cognitive disability worsening (decreased SDMT score by 8 or more)             |      |            |             |                          |                          |
| Passive smoking                                                                | N    | Years (SD) | Outcome (%) | HR (95% CI)              | HR (95% CI)              |
| Never exposed                                                                  | 2134 | 5.8 (3.5)  | 500 (23)    | 1.0 (reference)          | 1.0 (reference)          |
| Past exposure                                                                  | 2403 | 5.3 (3.5)  | 567 (24)    | 1.12 (0.99-1.26)         | 1.03 (0.91-1.17)         |
| Current exposure                                                               | 356  | 5.7 (3.7)  | 78 (22)     | 0.99 (0.78-1.26)         | 1.17 (0.92-1.49)         |

<sup>1</sup>crude; <sup>2</sup>adjusted for age at diagnosis, sex, disease phenotype, disease duration, baseline EDSS, disease-modifying therapy, smoking, and snuff use.

Supplementary table 8. HR with 95% CI of having unfavorable outcomes post-diagnosis, by snuff use habits at diagnosis. Restricted to those with **disease modifying treatment**.

| First clinical disease worsening (CDW)                                         |      |            |             |                          |                          |
|--------------------------------------------------------------------------------|------|------------|-------------|--------------------------|--------------------------|
| Snuff use status                                                               | N    | Years (SD) | Outcome (%) | HR (95% CI) <sup>1</sup> | HR (95% CI) <sup>2</sup> |
| Never user                                                                     | 6102 | 6.4 (5.0)  | 3603 (59)   | 1.0 (reference)          | 1.0 (reference)          |
| Past user                                                                      | 415  | 6.6 (5.0)  | 215 (51)    | 0.85 (0.74-0.98)         | 0.82 (0.71-0.94)         |
| Current user                                                                   | 971  | 6.4 (5.0)  | 577 (59)    | 0.99 (0.91-1.09)         | 0.98 (0.90-1.08)         |
| EDSS 3                                                                         |      |            |             |                          |                          |
| Snuff use status                                                               | N    | Years (SD) | Outcome (%) | HR (95% CI)              | HR (95% CI)              |
| Never user                                                                     | 3906 | 7.9 (5.3)  | 1634 (42)   | 1.0 (reference)          | 1.0 (reference)          |
| Past user                                                                      | 255  | 7.6 (5.2)  | 80 (32)     | 0.80 (0.64-1.00)         | 0.79 (0.63-0.99)         |
| Current user                                                                   | 604  | 8.0 (5.6)  | 246 (41)    | 0.95 (0.83-1.08)         | 0.93 (0.80-1.07)         |
| EDSS 4                                                                         |      |            |             |                          |                          |
| Snuff use status                                                               | N    | Years (SD) | Outcome (%) | HR (95% CI)              | HR (95% CI)              |
| Never user                                                                     | 3906 | 9.8 (5.4)  | 891 (23)    | 1.0 (reference)          | 1.0 (reference)          |
| Past user                                                                      | 255  | 9.0 (5.1)  | 48 (19)     | 0.88 (0.70-1.10)         | 0.80 (0.69-0.98)         |
| Current user                                                                   | 604  | 9.9 (5.7)  | 127 (21)    | 0.99 (0.86-1.13)         | 0.89 (0.66-1.20)         |
| Physical worsening (increased MSIS-29 physical score by 7.5 or more)           |      |            |             |                          |                          |
| Snuff use status                                                               | N    | Years (SD) | Outcome (%) | HR (95% CI)              | HR (95% CI)              |
| Never user                                                                     | 3749 | 5.1 (4.6)  | 1672 (45)   | 1.0 (reference)          | 1.0 (reference)          |
| Past user                                                                      | 276  | 5.4 (5.2)  | 123 (45)    | 0.95 (0.79-1.14)         | 0.91 (0.75-1.09)         |
| Current user                                                                   | 646  | 5.0 (4.0)  | 262 (41)    | 0.91 (0.80-1.04)         | 0.91 (0.79-1.05)         |
| Psychological worsening (increased MSIS-29 psychological score by 7.5 or more) |      |            |             |                          |                          |
| Snuff use status                                                               | N    | Years (SD) | Outcome (%) | HR (95% CI)              | HR (95% CI)              |
| Never user                                                                     | 3736 | 4.7 (4.6)  | 1929 (52)   | 1.0 (reference)          | 1.0 (reference)          |
| Past user                                                                      | 276  | 4.8 (5.0)  | 144 (52)    | 0.99 (0.84-1.18)         | 0.98 (0.83-1.17)         |
| Current user                                                                   | 641  | 4.5 (3.9)  | 318 (50)    | 0.97 (0.87-1.10)         | 0.97 (0.86-1.10)         |
| Cognitive disability worsening (decreased SDMT score by 8 or more)             |      |            |             |                          |                          |
| Snuff use status                                                               | N    | Years (SD) | Outcome (%) | HR (95% CI)              | HR (95% CI)              |
| Never user                                                                     | 3928 | 5.5 (3.6)  | 924 (24)    | 1.0 (reference)          | 1.0 (reference)          |
| Past user                                                                      | 291  | 5.6 (3.4)  | 67 (23)     | 0.92 (0.72-1.18)         | 0.82 (0.64-1.06)         |
| Current user                                                                   | 666  | 5.5 (3.6)  | 152 (23)    | 0.96 (0.81-1.14)         | 0.99 (0.83-1.19)         |

<sup>1</sup>crude; <sup>2</sup>adjusted for age at diagnosis, sex, disease phenotype, disease duration, baseline EDSS, disease-modifying therapy, smoking and passive smoking.
